# Supplementary material
Source: PubMed Central journal article supplement (PMC2786870)
Supplement: supp_29_24_6391__1.pdf [file supp_29_24_6391__1.pdf]

Fig. S1

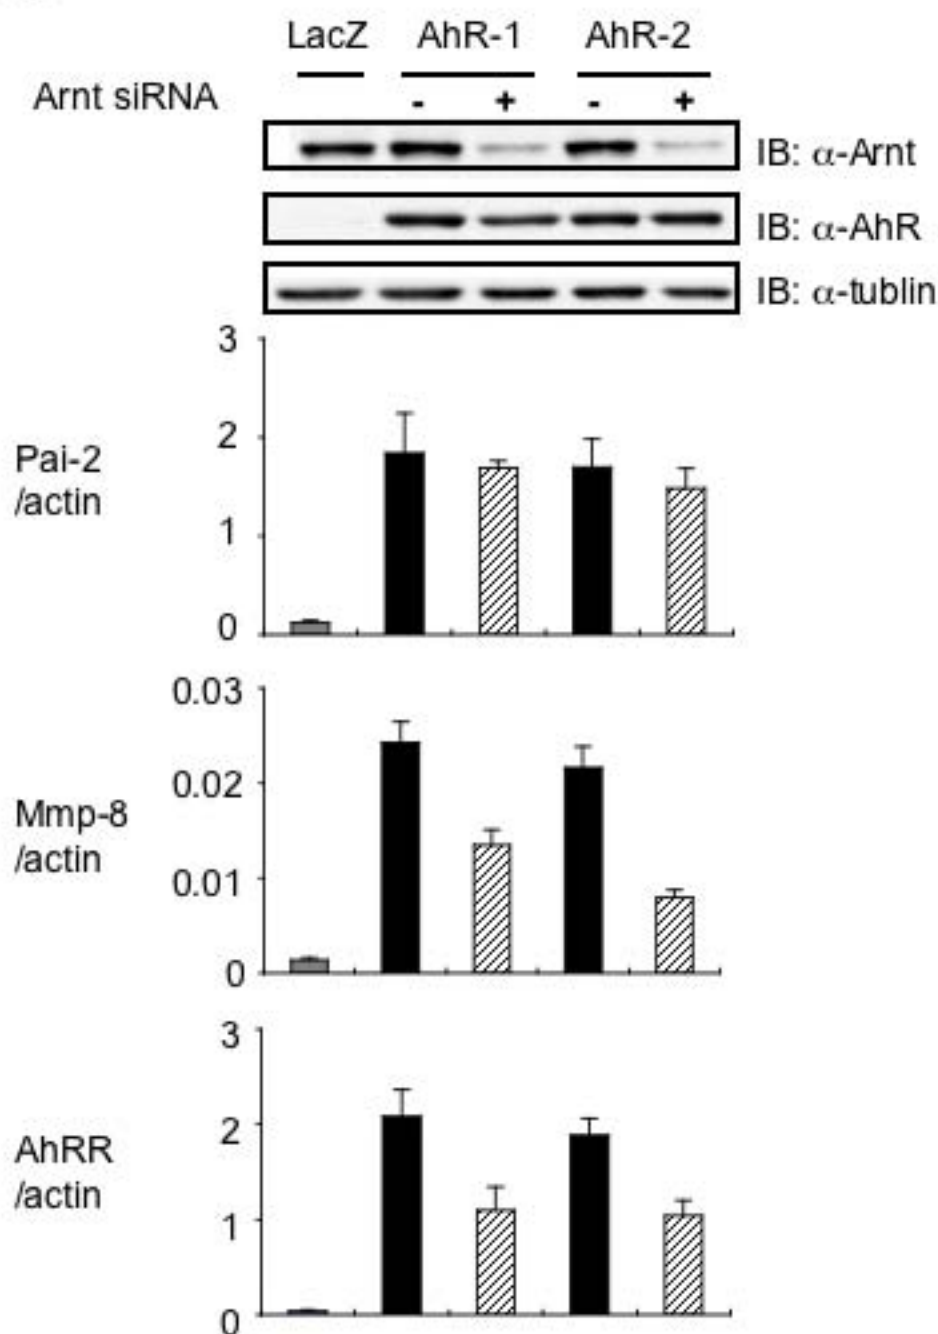

Fig. S1. Arnt is not required for AhR-transduced Pai-2 expression, using Arnt siRNA. Top panel, Immunoblot analysis of Arnt and AhR in ANA-1 cells treated with control or Arnt siRNA. Bottom panel, Relative expression levels of Pai-2, Mmp-8, and AhRR mRNA in LacZ or AhR-transduced ANA-1 cells treated with control (black bar) or Arnt siRNA (meshed bar).

Fig. S2

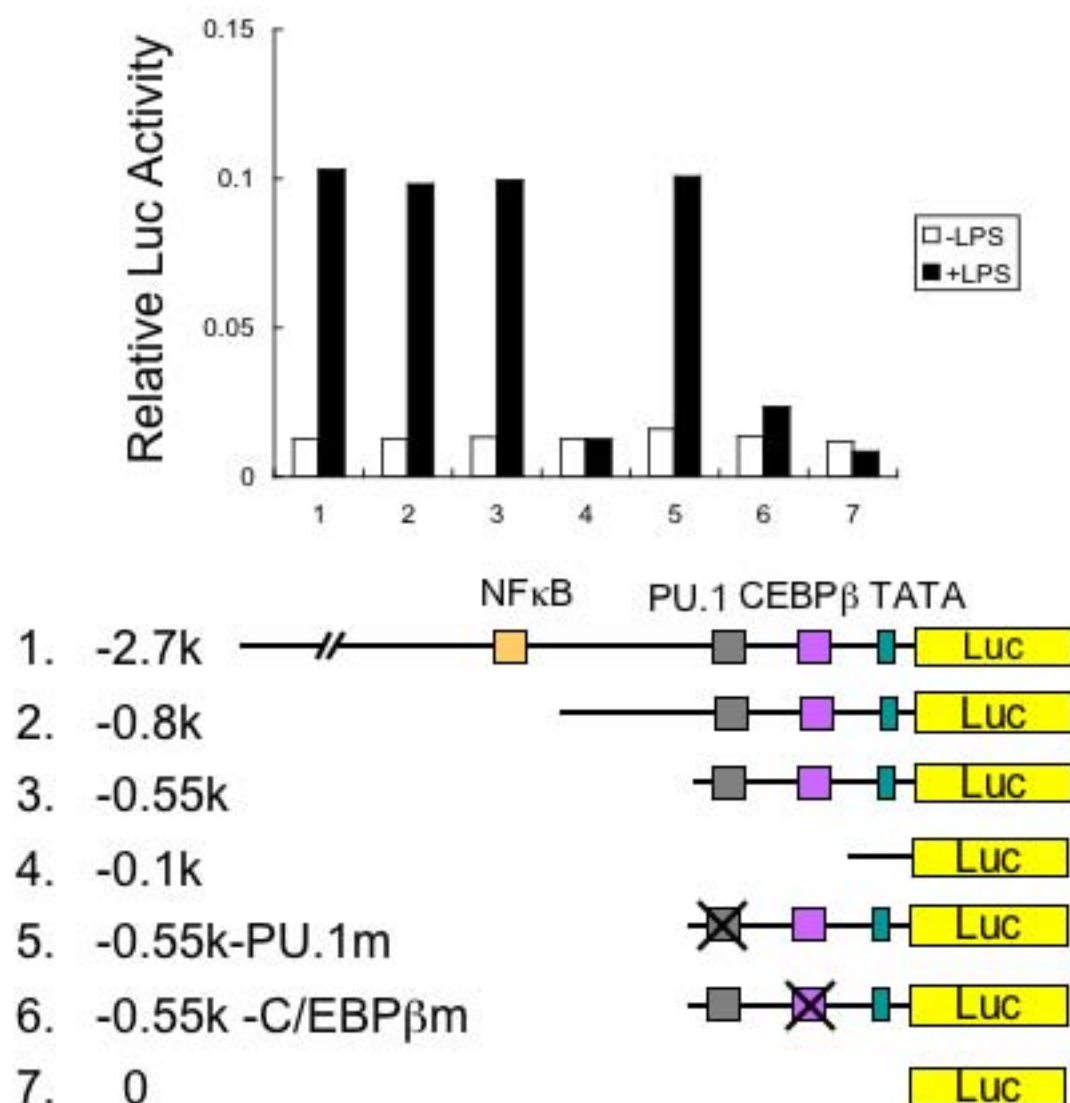

Fig. S2. Top panel, LPS-induced luciferase expression from RAW264.7 cells transfected with constructs containing the reporter gene fused to various truncated or mutated Pai-2 promoters. Bottom panel, Representation of the constructs containing the luciferase reporter gene fused to various truncated or mutated Pai-2 promoters.

Fig. S3

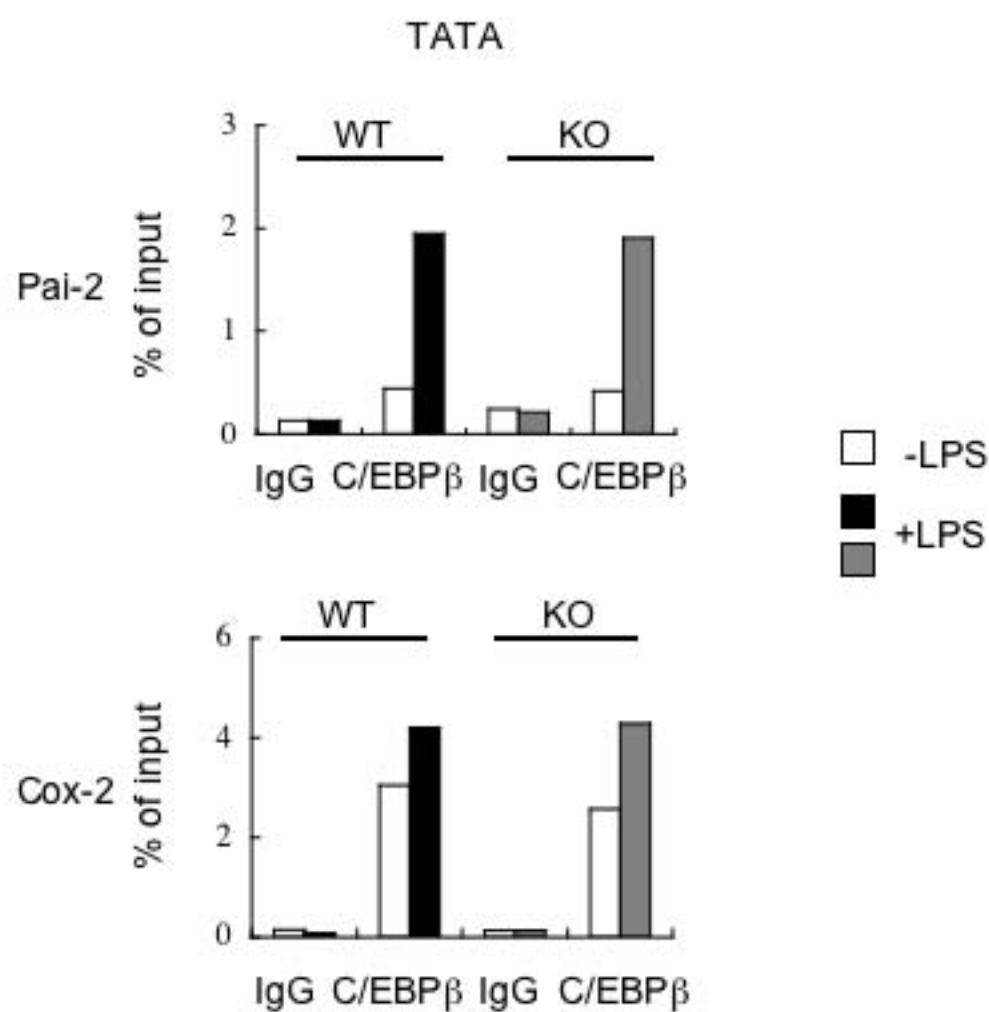

Fig. S3. ChIP analysis of the Pai-2 and Cox-2 promoters from LPS-induced AhR WT and KO PEMs using an antibody against C/EBP $\beta$ . ChIP analyses and real-time PCRs were performed as described in the Materials & Methods.

Fig. S4

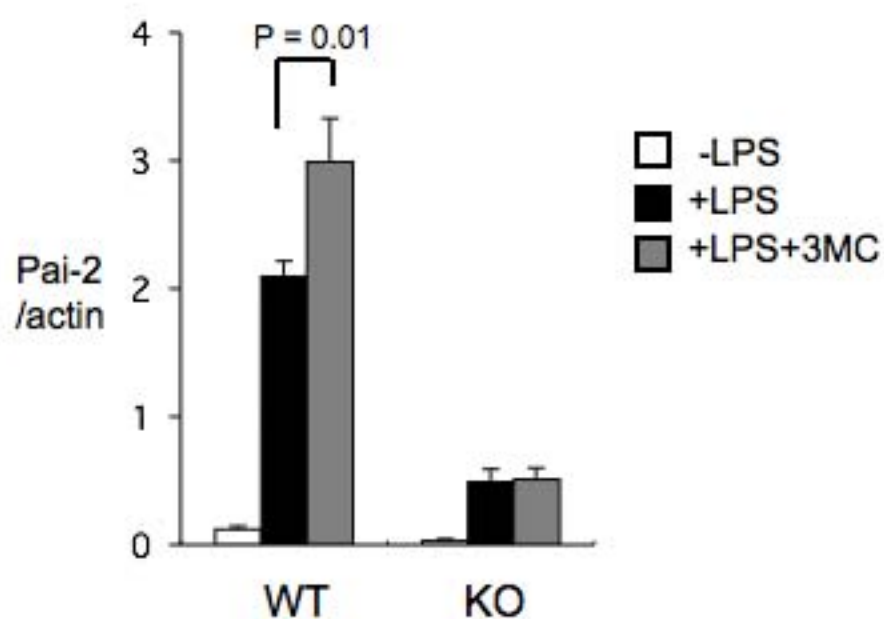

Fig. S4. The LPS stimulated Pai-2 expression slightly increased by adding AhR ligand, 3MC in AhR WT macrophages.

Relative expression levels of Pai-2 mRNA in AhRWT or AhRKO macrophages treated without (white bar) or with LPS (black bar) plus 3MC (grey bar).
